# Supplementary material
Source: PubMed Central journal article supplement (PMC3904505)
Supplement: NIHMS520278-supplement-2.pdf [file NIHMS520278-supplement-2.pdf]

**a**

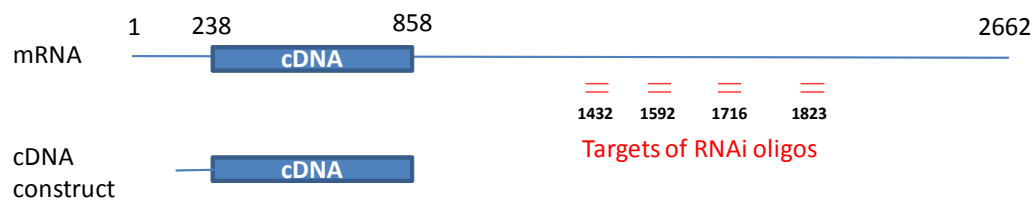

**b**

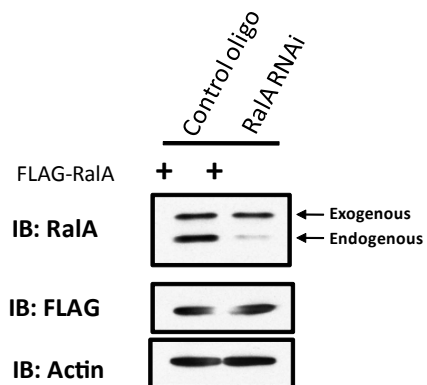

**Figure S1**

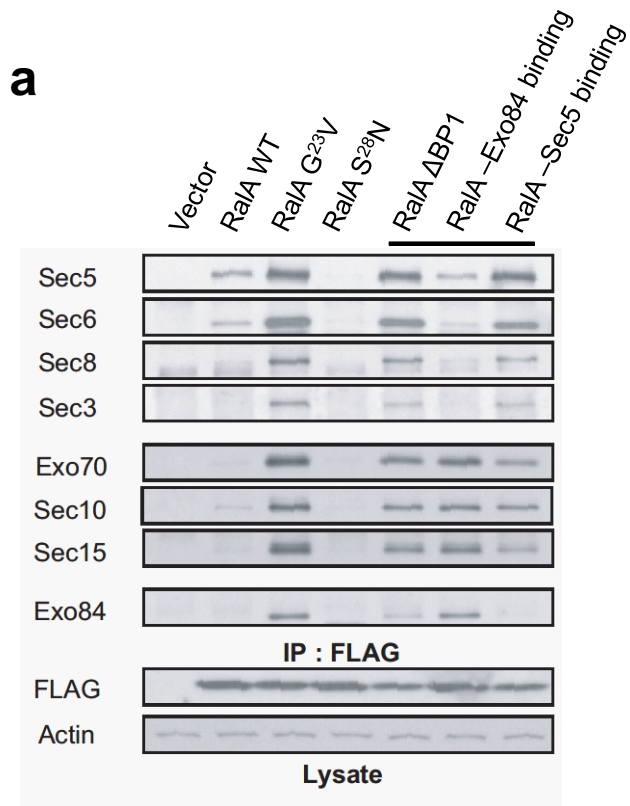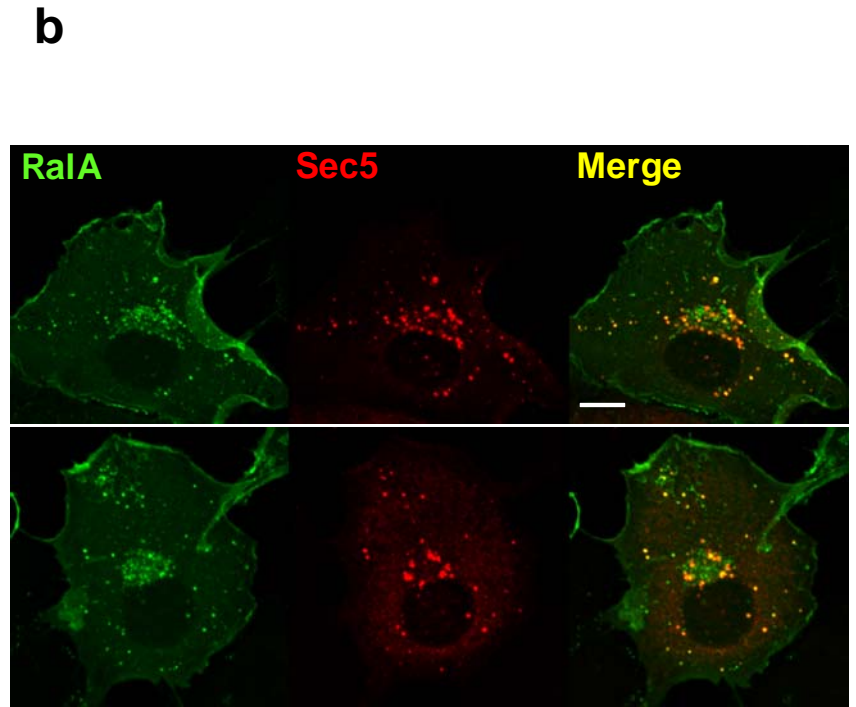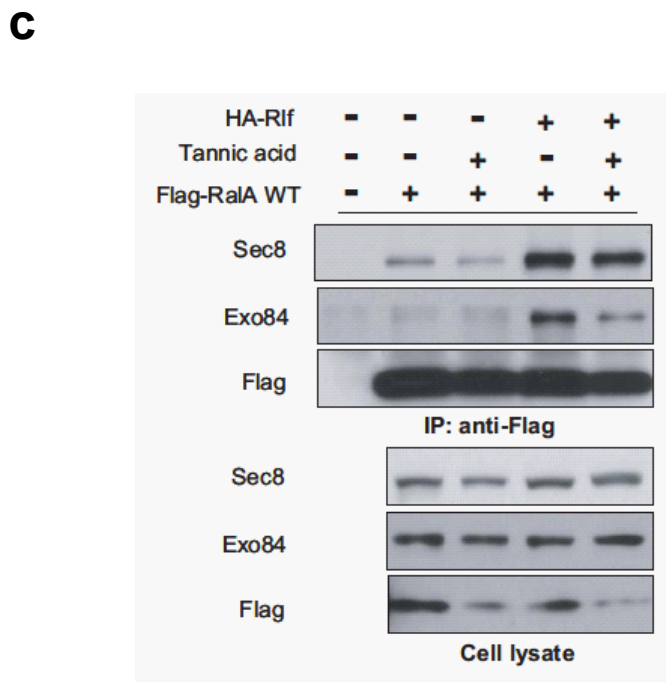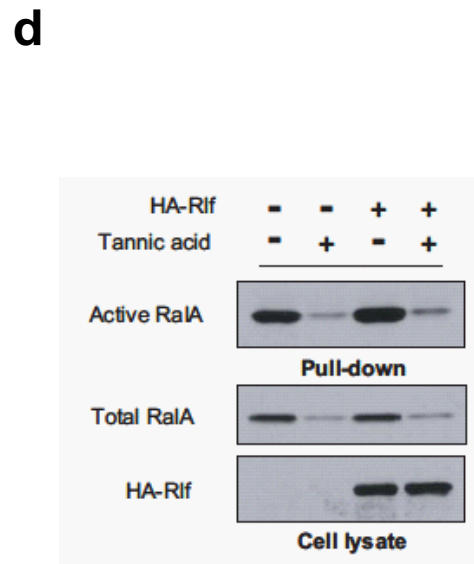

**Figure S2**

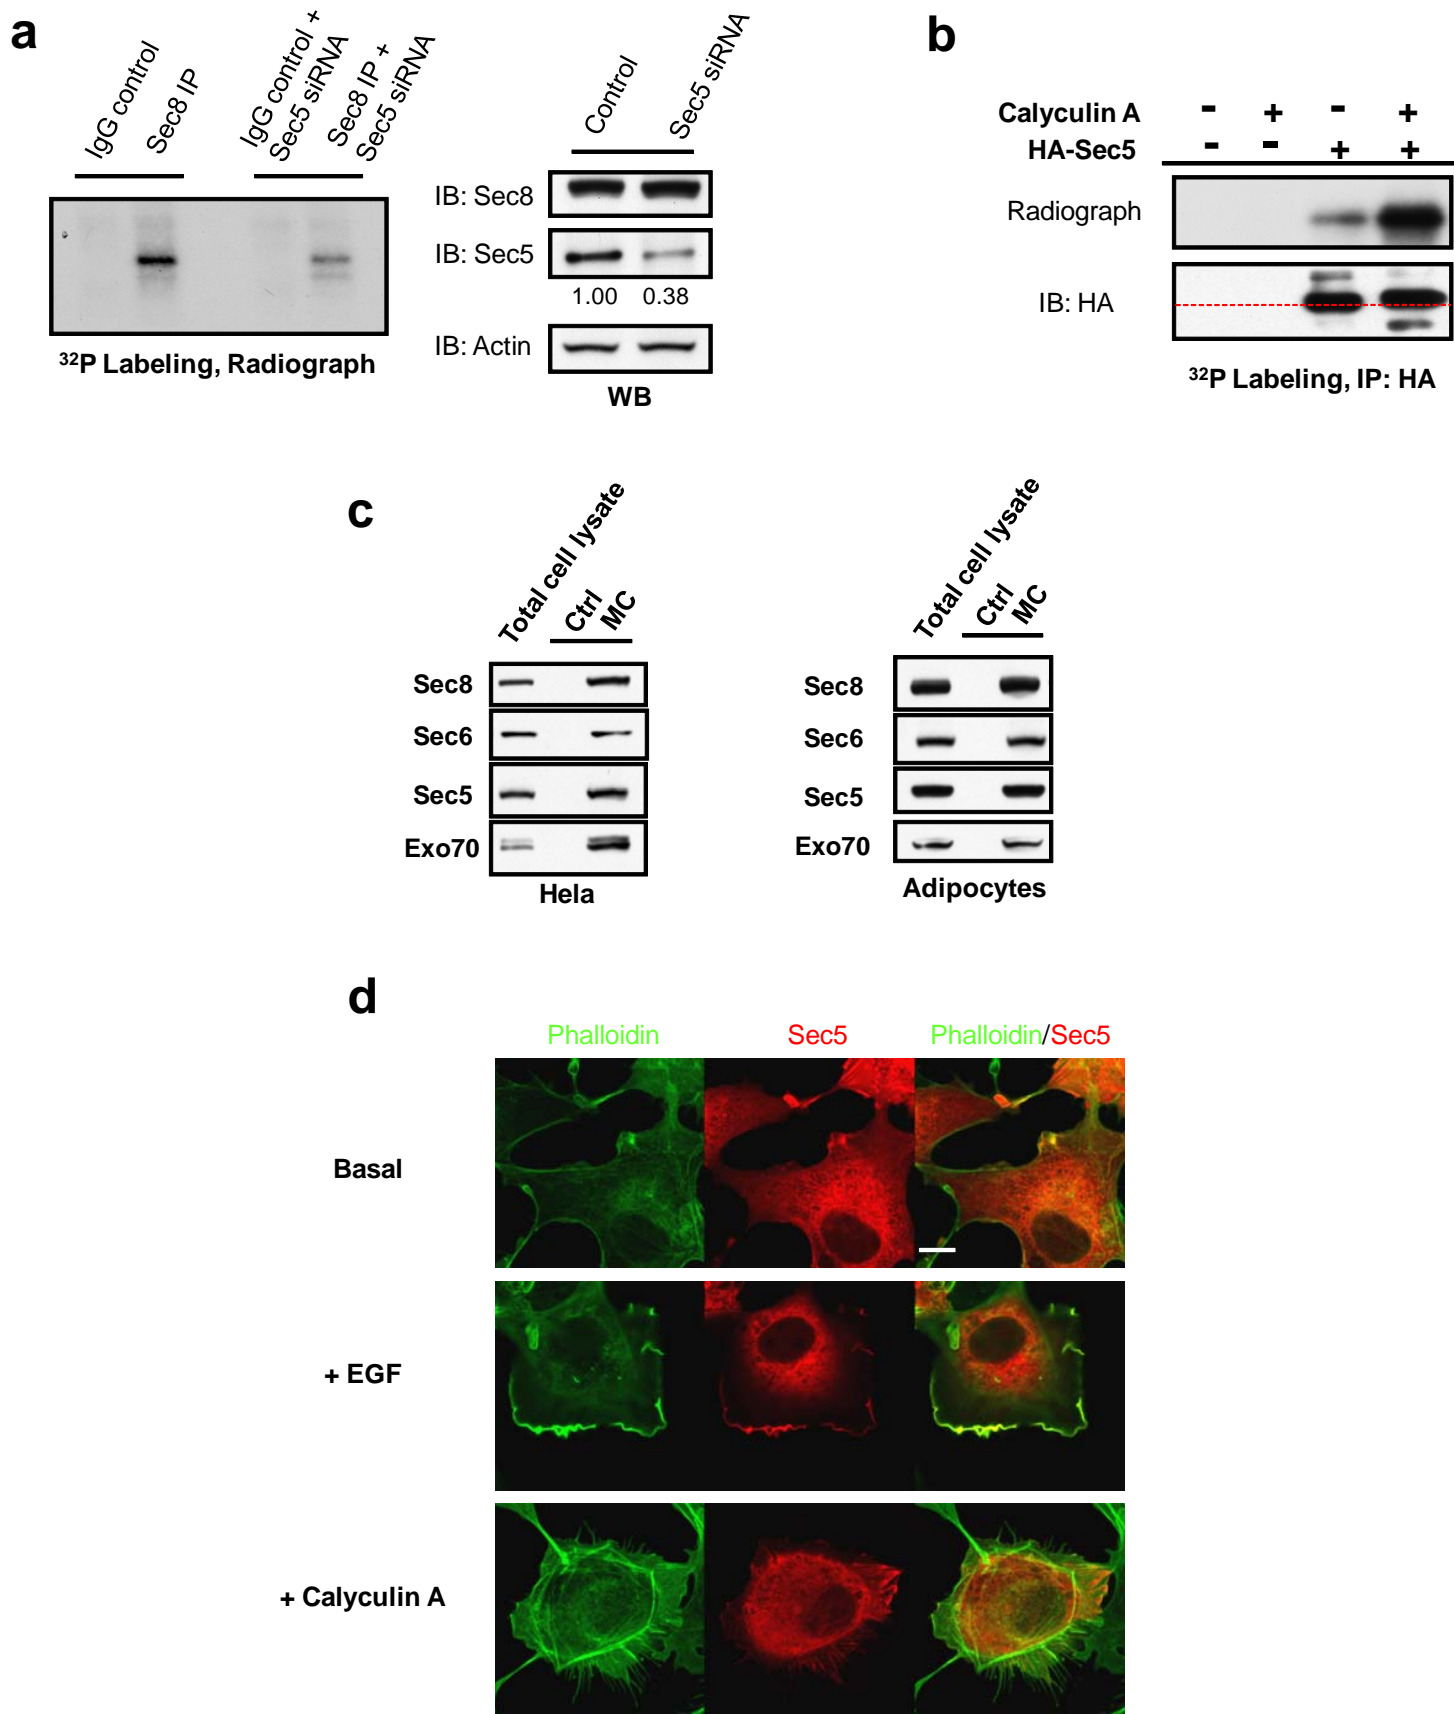

Figure S3

**a**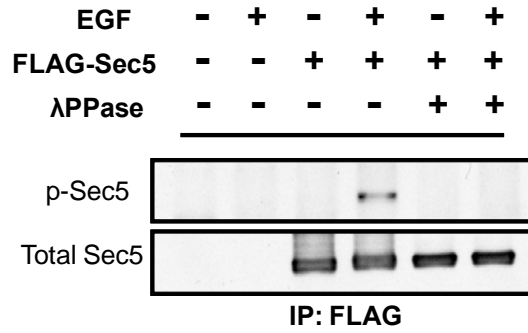**b**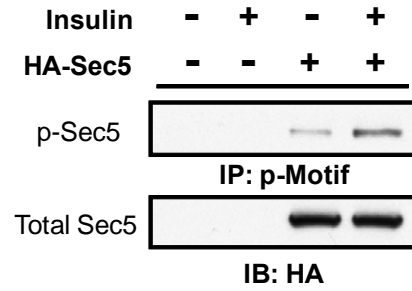**c**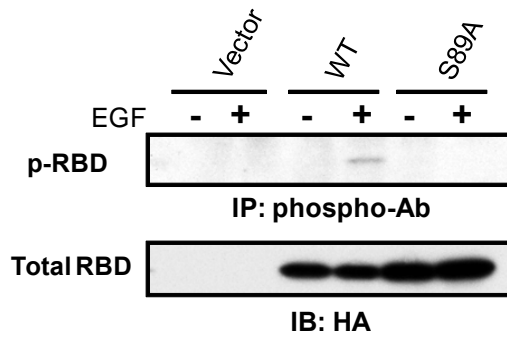**d**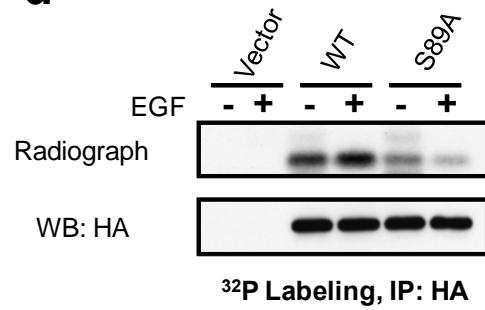**e**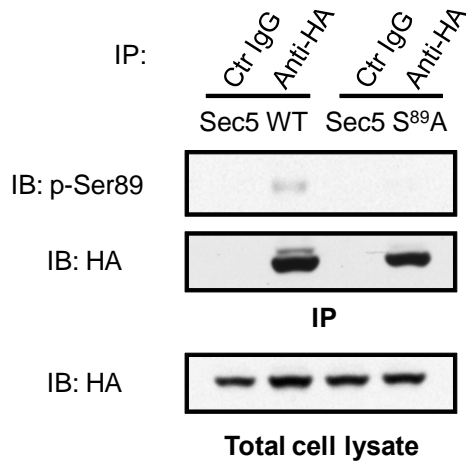**f**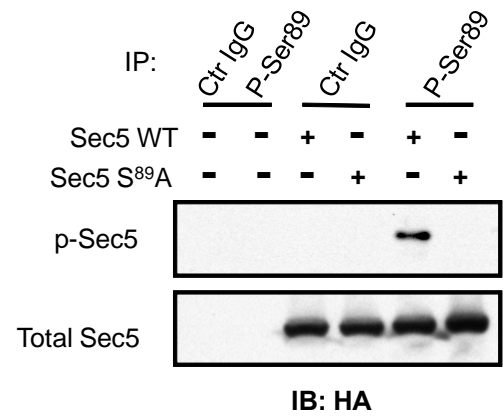**Figure S4**

**a**

MSRSRQPPLVTGISPNEGIPWTKVTIRGENLGT  
 GPTDLIGLTICGHNCLLTAEWMSASKIVCRVGQ  
 AKNDKGDIIVTTKSGGKGTSTVSFKLLKPEKIG  
 ILDQSAVWVDEMNYDMRTDR**RSRARKMEDSKE**  
**KNGKKKRKSLAKRIRERCIL**

**b**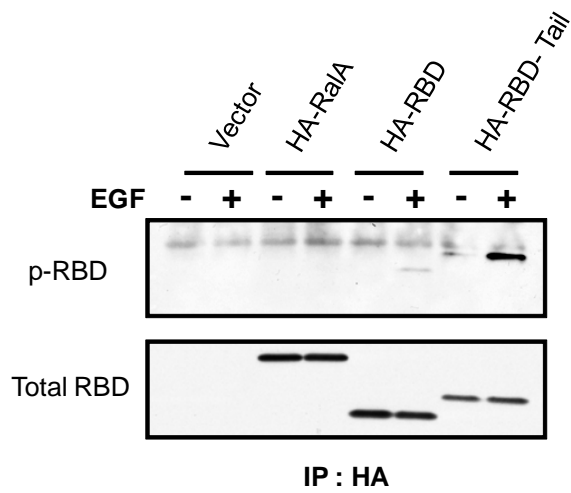**c**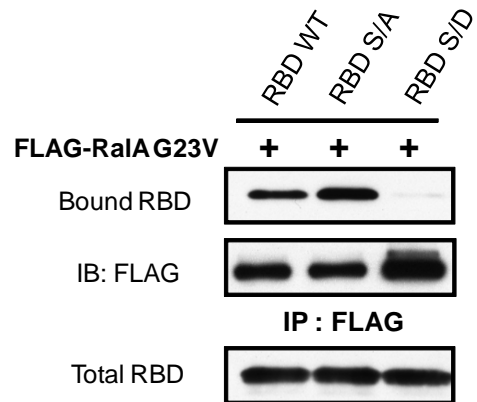**d**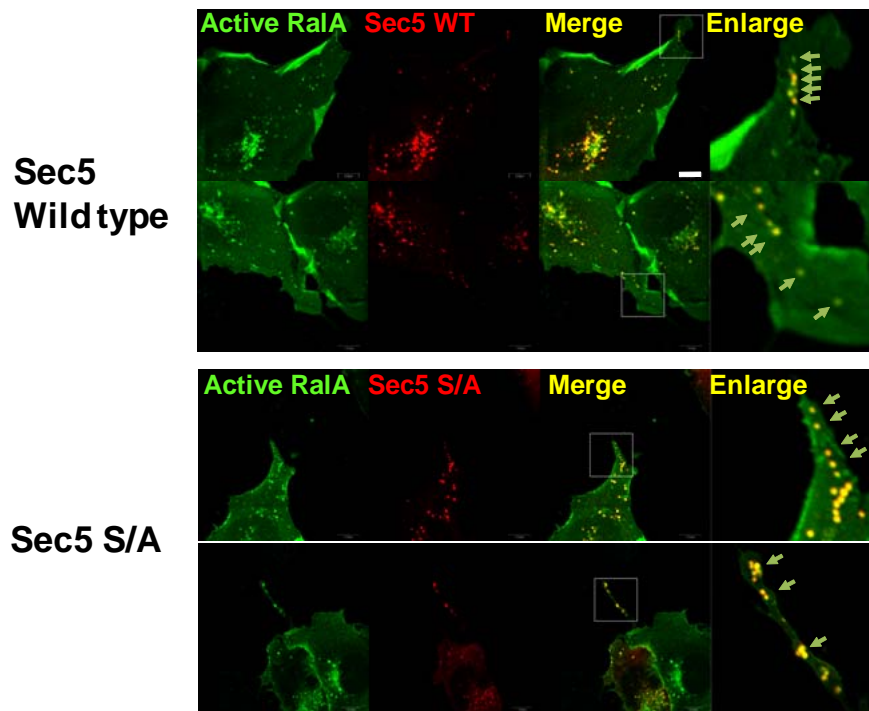**Figure S5**



Figure 1c

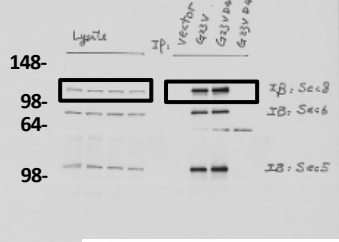

Figure 1e

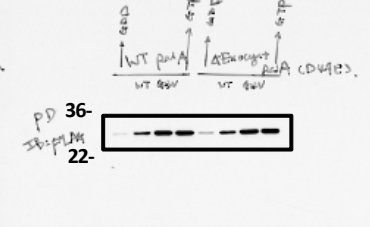

Figure 2a

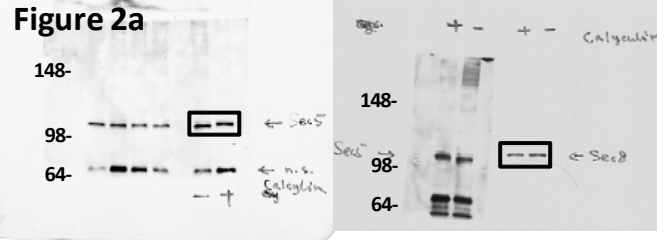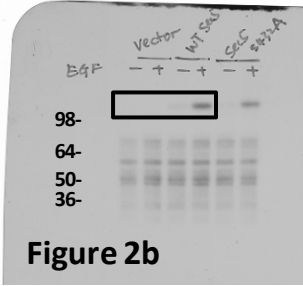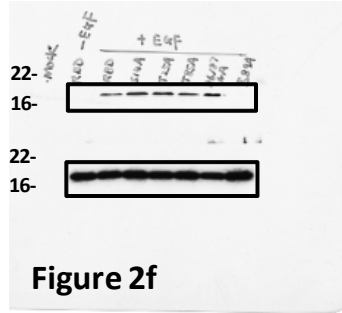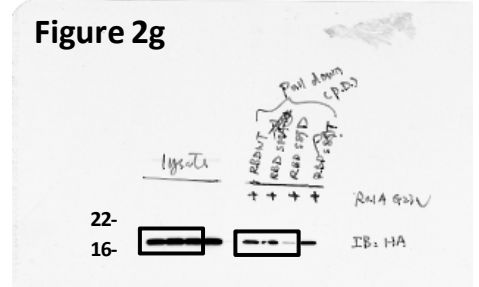

Figure 3a

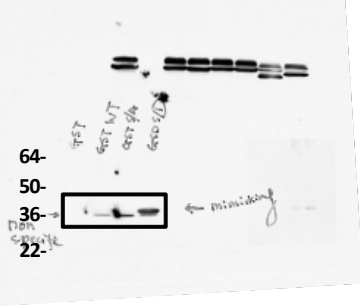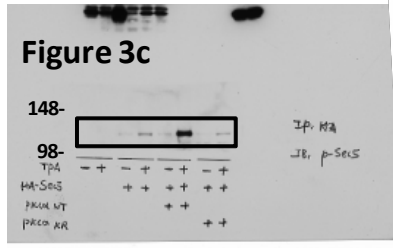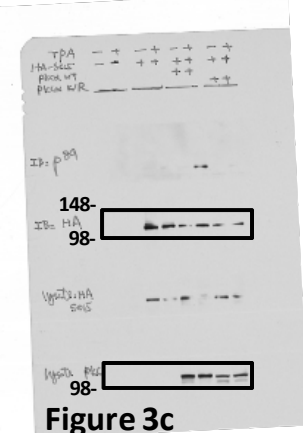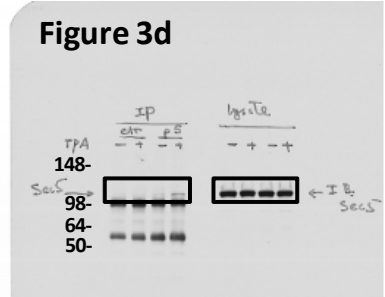

Figure 3g

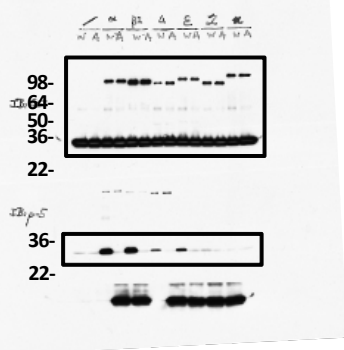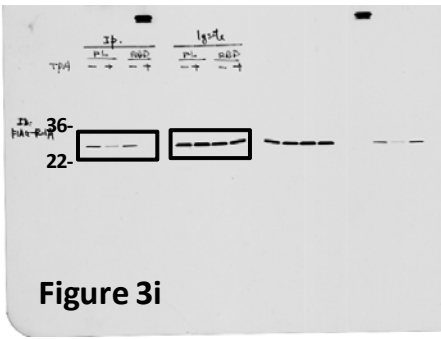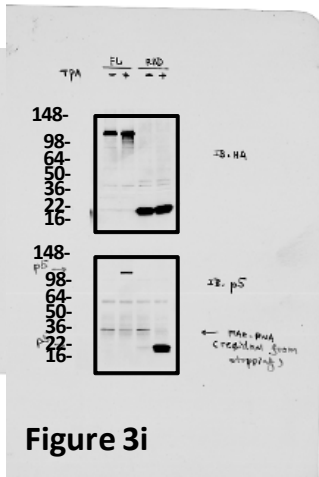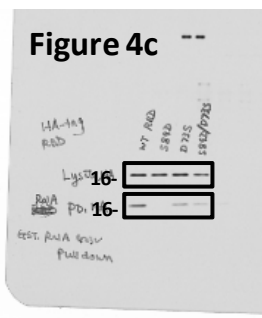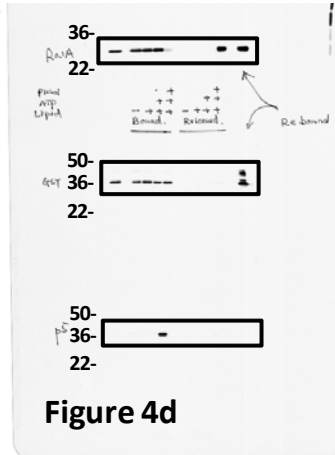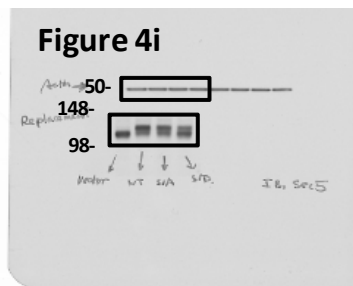

Figure S7
